# Supplementary material for: Preparation and characterization of novel phthalhydrazide-functionalized MCM-41 and its application in the one-pot synthesis of coumarin-fused triazolopyrimidines
Source: Royal Society of Chemistry journal article supplement (doi:10.1039/c7ra06240k), 2017-01-01
Supplement: c7ra06240k1.pdf [file c7ra06240k1.pdf]

## Supplementary data

### Preparation and characterization of novel phthalhydrazide functionalized MCM-41 and its application in the one-pot synthesis of 4-hydroxycoumarin fused triazolopyrimidines

Sedigheh Akrami, Bahador Karami\* and Mahnaz Farahi

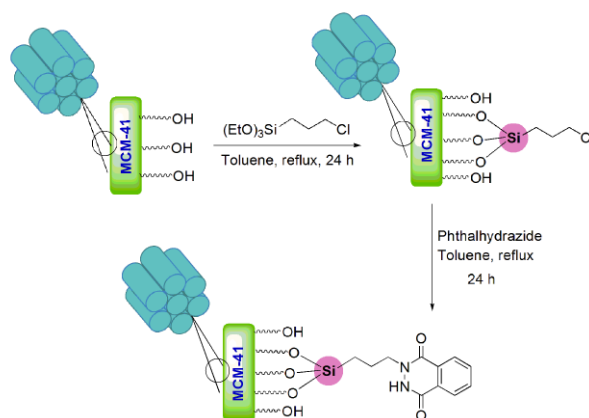

<sup>1</sup>H NMR (DMSO-d<sub>6</sub>, 400 MHz)

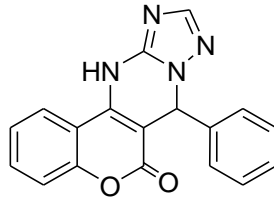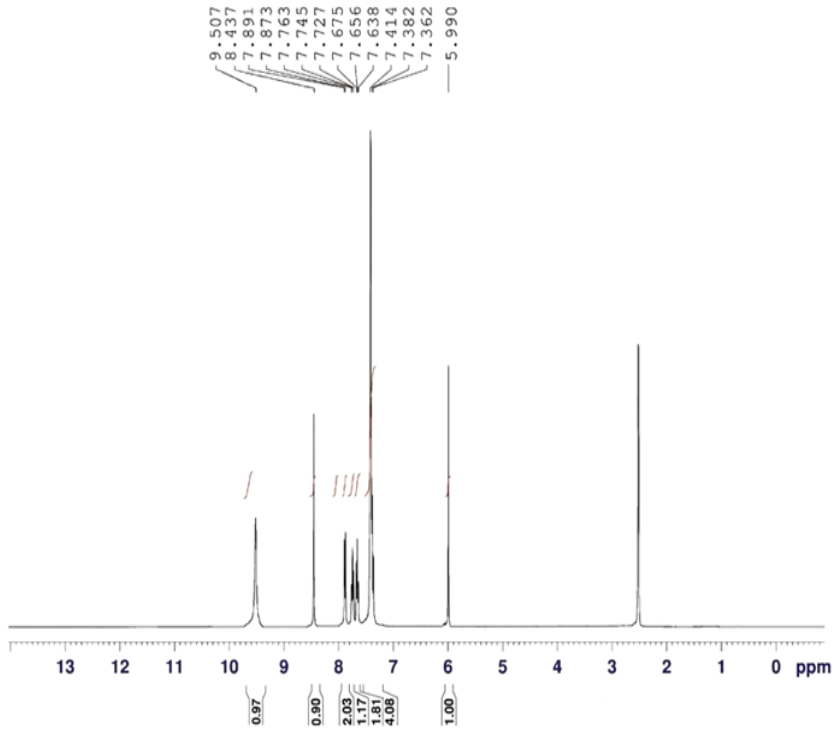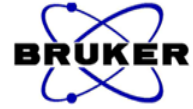

NAME Yasooj UN  
EXPNO 101  
PROCNO 1  
Date\_ 20150420  
Time 14.44  
INSTRUM spect  
PROBHD 5 mm PABBO BB-  
PULPROG zg30  
TD 65536  
SOLVENT DMSO  
NS 32  
DS 0  
SWH 8012.820 Hz  
FIDRES 0.122266 Hz  
AQ 4.0894966 sec  
RG 203  
DW 62.400 usec  
DE 6.50 usec  
TE 295.6 K  
D1 6.0000000 sec  
TD0 1

----- CHANNEL f1 -----  
NUC1 1H  
P1 14.00 usec  
PL1 -2.00 dB  
PL1W 11.86359406 W  
SFO1 400.2236020 MHz  
SI 32768  
SF 400.2200000 MHz  
WDW EM  
SSB 0  
LB 0.30 Hz  
GB 0  
PC 1.00

<sup>13</sup>C NMR (DMSO-d<sub>6</sub>, 100 MHz)

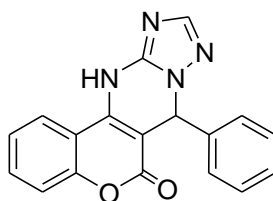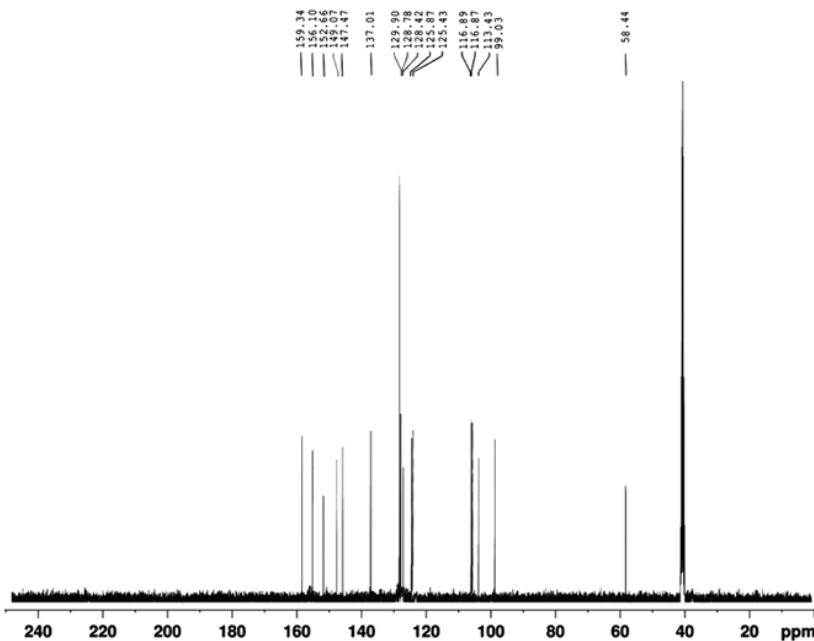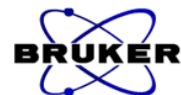

```
NAME      Yasooj UN
EXPNO     102
PROCNO    1
Date_     20150420
Time      14.57
INSTRUM   spect
PROBHD    5 mm PABBO BB-
PULPROG   zgpg
TD         65536
SOLVENT   DMSO
NS         70
DS         0
SWH        25252.525 Hz
FIDRES    0.385323 Hz
AQ         1.2976629 sec
RG         2050
DM         19.800 usec
DE         6.50 usec
TE         296.1 K
D1         3.0000000 sec
D11        0.0300000 sec
TD0        1

----- CHANNEL f1 -----
NUC1      13C
P1         9.00 usec
PL1        -0.90 dB
PL1W      42.02801895 W
SFO1      100.6479784 MHz

----- CHANNEL f2 -----
CPDPRG2   waltz16
NUC2       1H
PCPD2     90.00 usec
PL2        -2.00 dB
PL12       14.16 dB
PL13       17.90 dB
PL1W      11.86359406 W
PL12W     0.28722104 W
PL13W     0.12139934 W
SFO2      400.2216009 MHz
SI         32768
SF         100.6353990 MHz
WDW        EM
SSB         0
LB         1.00 Hz
GB         0
PC         1.40
```

<sup>1</sup>H NMR (DMSO-d<sub>6</sub>, 400 MHz)

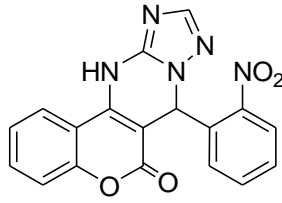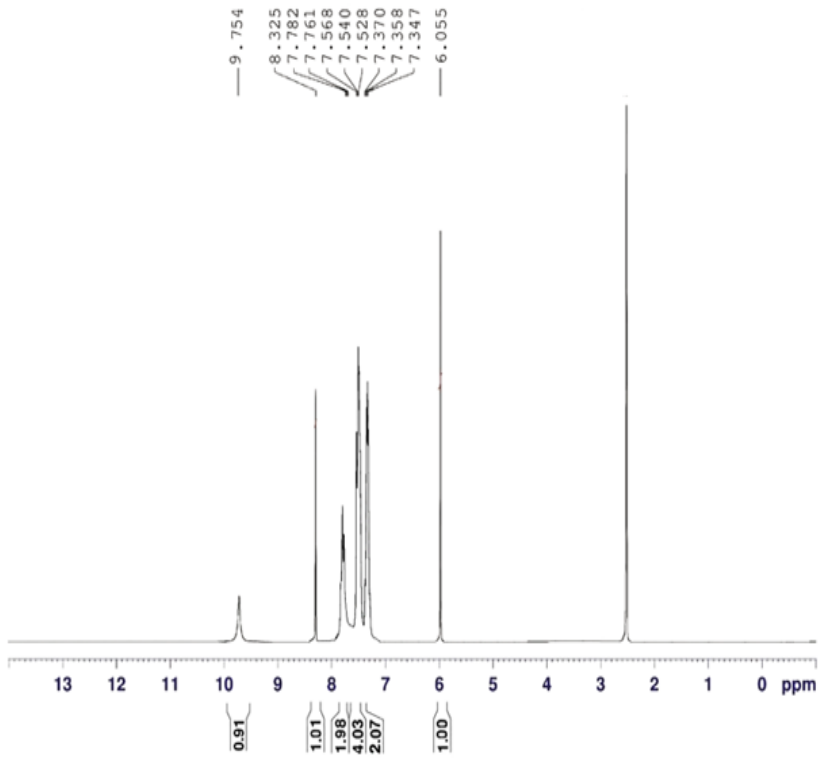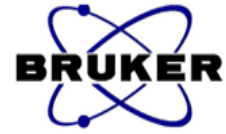

```
NAME      Yasooj UN
EXPNO     103
PROCNO    1
Date_     20150420
Time      15.19
INSTRUM   spect
PROBHD    5 mm PABBO BB-
PULPROG   zg30
TD         65536
SOLVENT   DMSO
NS         32
DS         0
SWH       8012.820 Hz
FIDRES    0.122266 Hz
AQ         4.0894966 sec
RG         203
DW         62.400 usec
DE         6.50 usec
TE         295.6 K
D1         6.00000000 sec
TDO        1
```

```
***** CHANNEL f1 *****
NUC1      1H
P1        14.00 usec
PL1       -2.00 dB
PL1W      11.86359406 W
SFO1      400.2236020 MHz
SI        32768
SF        400.2200000 MHz
WDW       EM
SSB       0
LB        0.30 Hz
GB        0
PC        1.00
```

<sup>13</sup>C NMR (DMSO-d<sub>6</sub>, 100 MHz)

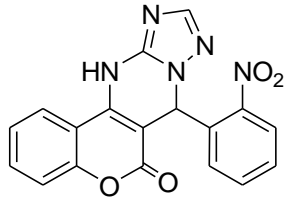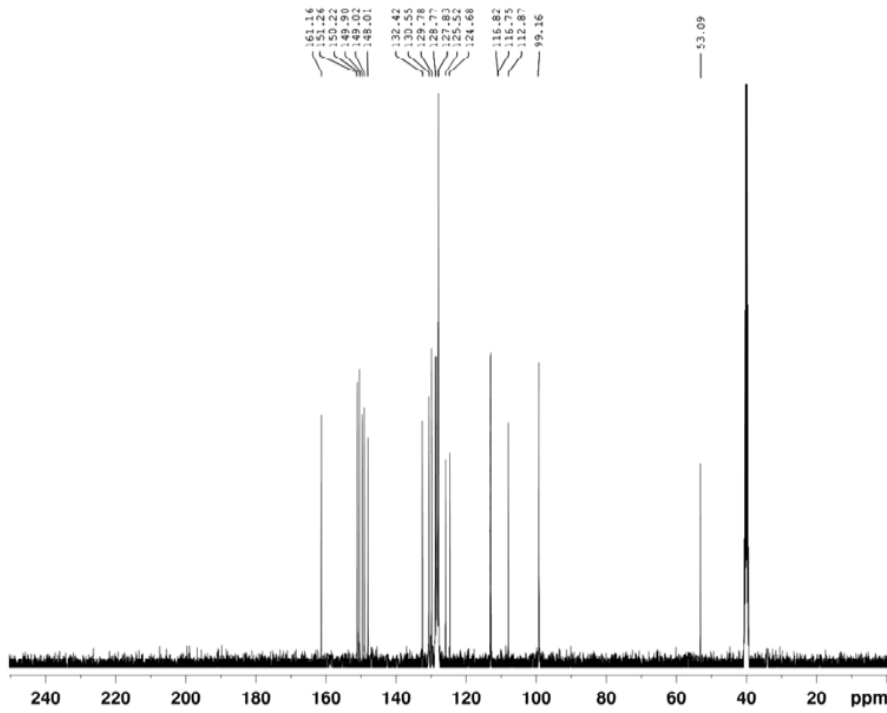

<sup>1</sup>H NMR (DMSO-d<sub>6</sub>, 400 MHz)

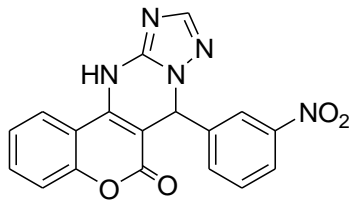

8.461  
8.061  
8.111  
8.107  
8.092  
7.863  
7.671  
7.652  
7.646  
7.626  
7.607  
7.195  
7.176  
6.112

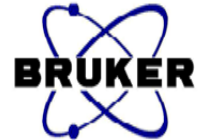

NAME YASOOJ UN  
EXPNO 107  
PROCNO 1  
Date\_ 20150420  
Time 13.28  
INSTRUM spect  
PROBHD 5 mm PABBO BB-  
PULPROG zg30  
ID 65536  
SOLVENT DMSO  
NS 32  
DS 0  
SWH 8012.820 Hz  
FIDRES 0.122266 Hz  
AQ 4.0894966 sec  
RG 203  
DW 62.400 usec  
DE 6.50 usec  
TE 295.6 K  
D1 6.0000000 sec  
TD 1

\*\*\*\*\* CHANNEL f1 \*\*\*\*\*  
NUC1 1H  
P1 14.00 usec  
PL1 -2.00 dB  
PL1W 11.86359406 W  
SFO1 400.2236020 MHz  
SI 32768  
SF 400.2200000 MHz  
WDW EM  
SSB 0  
LB 0.30 Hz  
GB 0  
PC 1.00

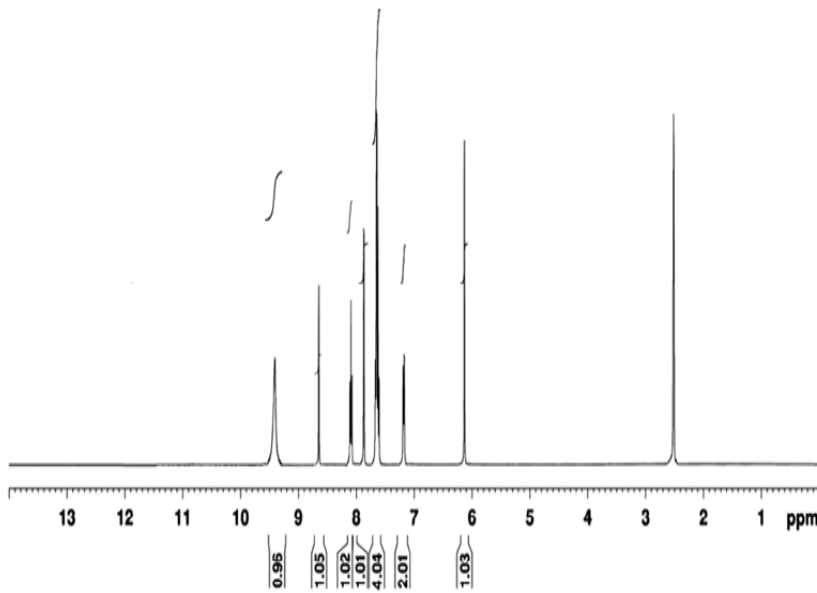

<sup>13</sup>C NMR (DMSO-d<sub>6</sub>, 100 MHz)

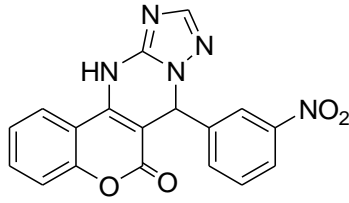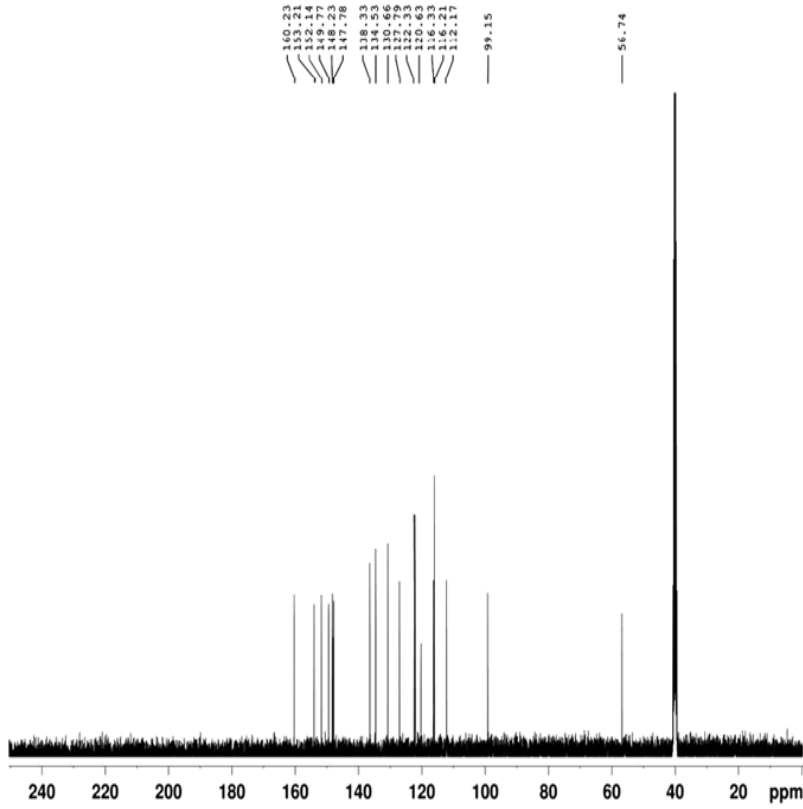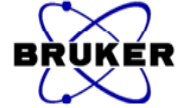

NAME Yasoo1 UN  
EXPNO 108  
PROCNO 1  
Date\_ 20150420  
Time 16.11  
INSTRUM spect  
PROBHD 5 mm PABBO BB-  
PULPROG zgpg  
TD 65536  
SOLVENT DMSO  
NS 70  
DS 0  
SWH 25252.325 Hz  
FIDRES 0.385323 Hz  
AQ 1.2976629 sec  
RG 2050  
DM 19.800 usec  
DE 6.50 usec  
TE 296.1 K  
D1 3.0000000 sec  
D11 0.0300000 sec  
TDO 1

----- CHANNEL f1 -----  
NUC1 13C  
P1 9.00 usec  
PL1 -0.90 dB  
PL1W 42.02801895 W  
SFO1 100.6479784 MHz

----- CHANNEL f2 -----  
CPDPRG2 waltz16  
NUC2 1H  
PCPD2 90.00 usec  
Pz2 -2.00 dB  
PL12 14.16 dB  
PL13 17.90 dB  
PL2W 11.86359406 W  
PL12W 0.28722104 W  
PL13W 0.12139934 W  
SFO2 400.2216009 MHz  
S1 32768  
SF 100.6353990 MHz  
WDW EM  
SSB 0  
LB 1.00 Hz  
GB 0  
PC 1.40

<sup>1</sup>H NMR (DMSO-d<sub>6</sub>, 400 MHz)

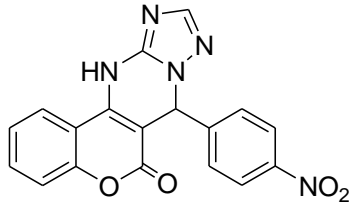

9.821  
8.611  
8.492  
8.476  
8.086  
8.062  
7.671  
7.652  
7.646  
7.626  
7.507  
7.504  
7.543  
7.195  
7.174  
6.081

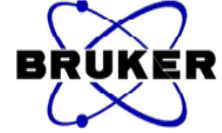

NAME Yasooj UN  
EXPNO 105  
PROCNO 1  
Date\_ 20150420  
Time 15.37  
INSTRUM spect  
PROBHD 5 mm PABBO BB-  
PULPROG zg30  
TD 65536  
SOLVENT DMSO  
NS 32  
DS 0  
SWH 8012.820 Hz  
FIDRES 0.122266 Hz  
AQ 4.0894966 sec  
RG 203  
DW 62.400 usec  
DE 6.50 usec  
TE 295.6 K  
D1 6.00000000 sec  
TDO 1

\*\*\*\*\* CHANNEL f1 \*\*\*\*\*  
NUC1 1H  
P1 14.00 usec  
PL1 -2.00 dB  
PL1W 11.86359406 W  
SFO1 400.2236020 MHz  
SI 32768  
SF 400.2200000 MHz  
WDW EM  
SSB 0  
LB 0.30 Hz  
GB 0  
PC 1.00

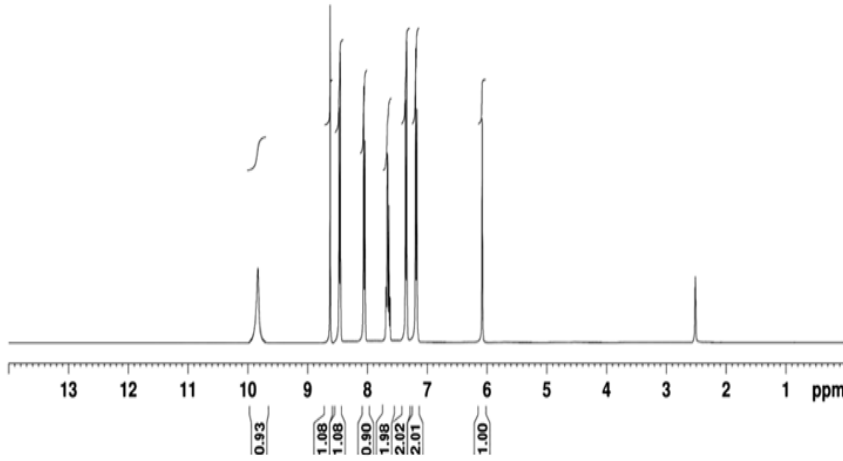



<sup>13</sup>C NMR (DMSO-d<sub>6</sub>, 100 MHz)

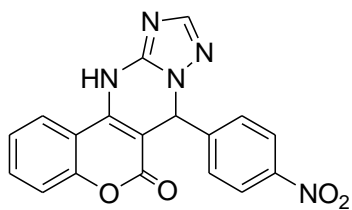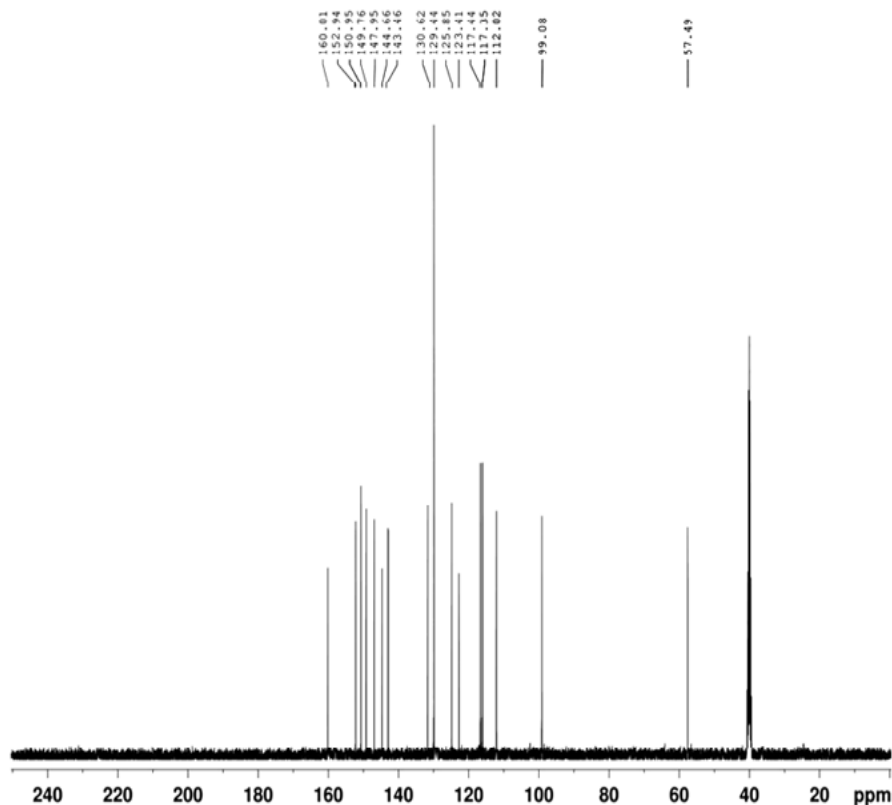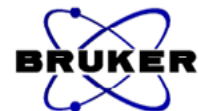

```
NAME          Yasooj UN
EXPNO          106
PROCNO         1
Date_          20150420
Time           15.43
INSTRUM        spect
PROBHD         5 mm PABBO BB-
PULPROG        zgpg
TD              65536
SOLVENT        DMSO
NS              70
DS              0
SWH            25252.525 Hz
FIDRES         0.385323 Hz
AQ             1.2976629 sec
RG             2050
DW             19.800 usec
DE             6.50 usec
TE             296.1 K
D1             3.0000000 sec
D11            0.03000000 sec
TDO            1

===== CHANNEL f1 =====
NUC1            13C
P1              9.00 usec
PL1            -0.90 dB
PL1W           42.02801895 W
SFO1           100.6479784 MHz

===== CHANNEL f2 =====
CPDPRG2        waltz16
NUC2            1H
PCPDZ          90.00 usec
PL2            -2.00 dB
PL12           14.16 dB
PL13           17.90 dB
PL2W           11.86359406 W
PL12W          0.28722104 W
PL13W          0.12139934 W
SFO2           400.2216009 MHz
SI              32768
SF             100.6353990 MHz
WDW            EM
SSB            0
LB             1.00 Hz
GB              0
PC             1.40
```

<sup>1</sup>H NMR (DMSO-d<sub>6</sub>, 400 MHz)

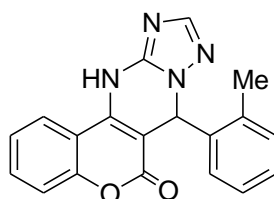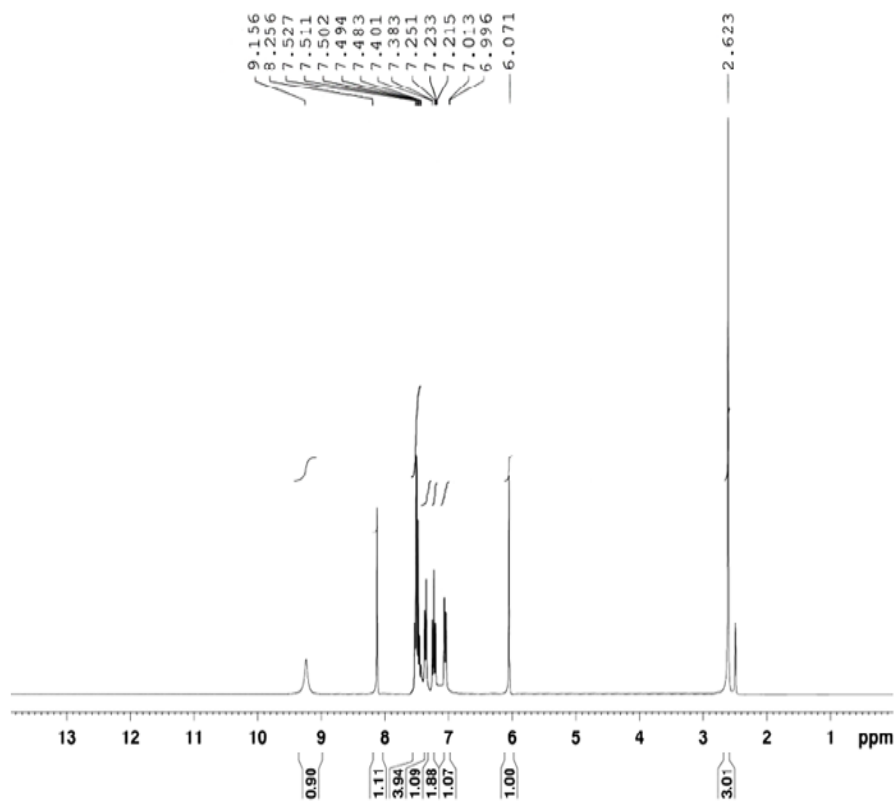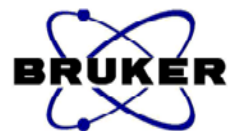

```
NAME      Yasooj UN
EXPNO     109
PROCNO    1
Date_     20150420
Time      16.34
INSTRUM   spect
PROBHD    5 mm PABBO DD-
PULPROG   zg30
TD        65536
SOLVENT   DMSO
NS        32
DS        0
SWH       8012.820 Hz
FIDRES    0.122266 Hz
AQ        4.0894966 sec
RG        203
NW        62.400 usec
DE        6.50 usec
TE        295.6 K
D1        6.00000000 sec
TD0       1

***** CHANNEL f1 *****
NUC1      1H
P1        14.00 usec
PL1       -2.00 dB
PL1W      11.86359406 W
SFO1      400.2236020 MHz
SI        32768
SF        400.2200000 MHz
WDW       EM
SSB       0
LB        0.30 Hz
GB        0
PC        1.00
```

<sup>13</sup>C NMR (DMSO-d<sub>6</sub>, 100 MHz)

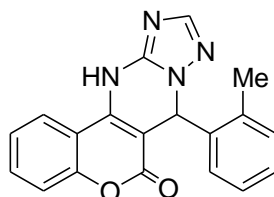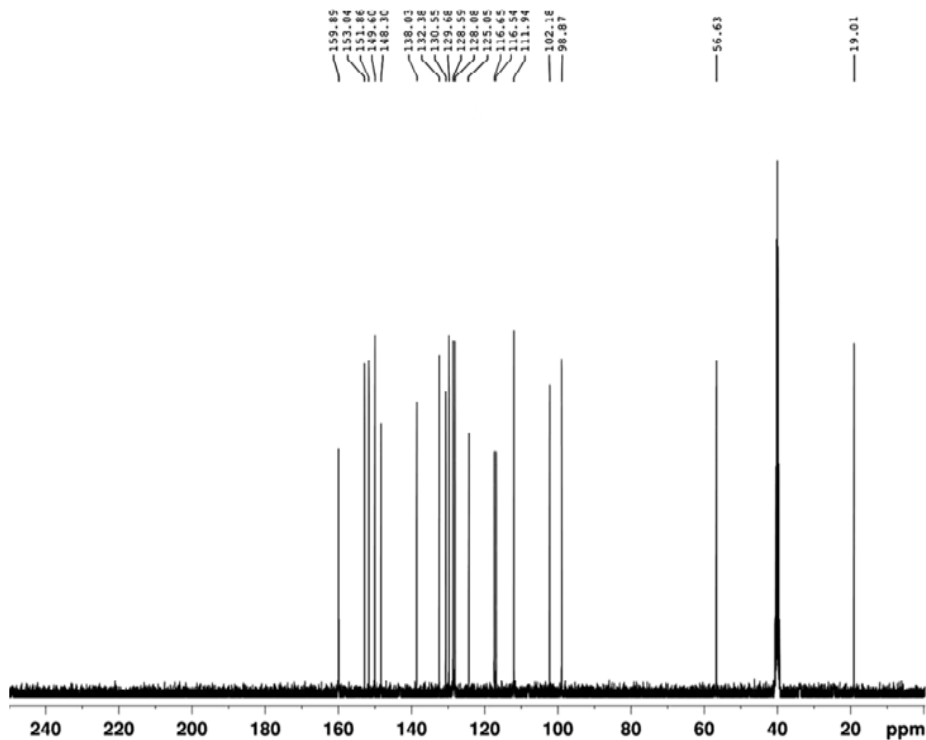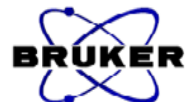

```

NAME          Yaxooj UN
EXPNO         110
PROCNO        1
Date_         20150420
Time          16.39
INSTRUM       spect
PROBHD        5 mm PABBO BBO
PULPROG       zgpg
ID            65536
SOLVENT       DMSO
NS            70
DS            0
SWH           25252.525 Hz
FIDRES        0.385323 Hz
AQ            1.2976629 sec
RG            2050
DW            19.800 usec
DE            6.30 usec
TE            296.1 K
D1            3.0000000 sec
d11           0.0300000 sec
TDO           1

----- CHANNEL f1 -----
NUC1          13C
P1            9.00 usec
PL1           -0.30 dB
PL1W          42.02801895 W
SFO1          100.6479784 MHz

===== CHANNEL f2 =====
CPDPRG2       waltz16
NUC2          1H
PCPD2         90.00 usec
PL2           -2.00 dB
PL12          14.16 dB
PL13          17.30 dB
PL2W          11.86359406 W
PL12W         0.28722104 W
PL13W         0.12139934 W
SFO2          400.2216009 MHz
SI            32768
SF            100.6353990 MHz
WDW           BH
SSB           0
LB            1.00 Hz
GB            0
PC            1.40
    
```

<sup>1</sup>H NMR (DMSO-d<sub>6</sub>, 400 MHz)

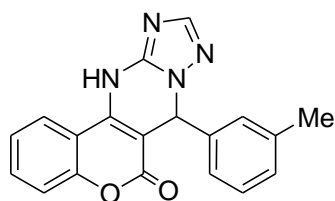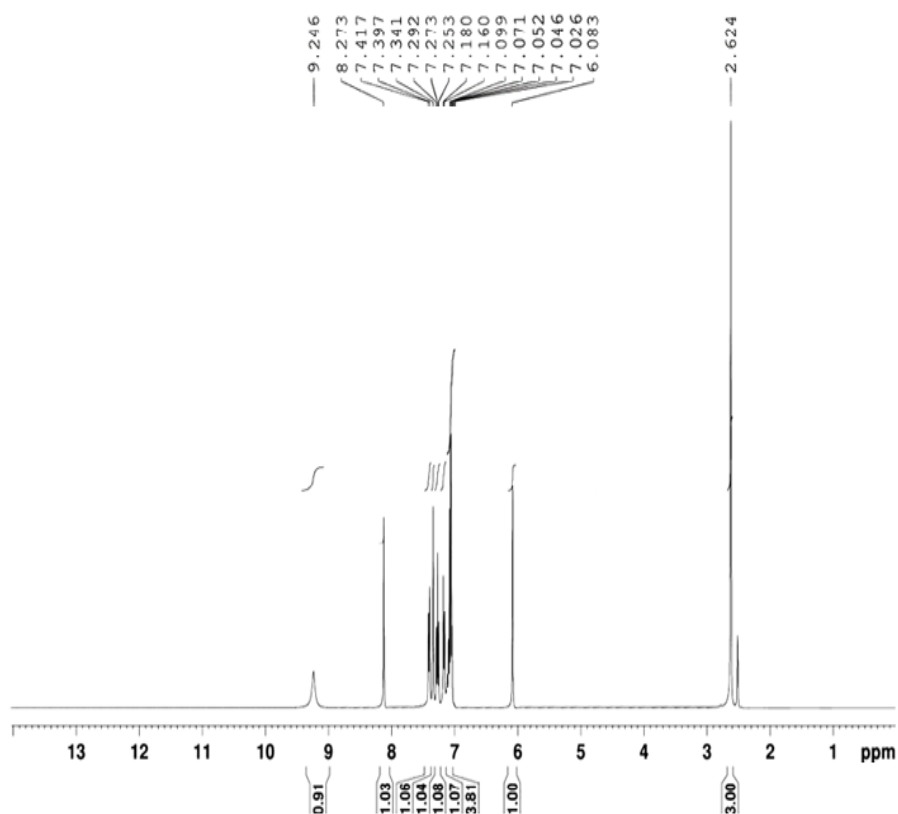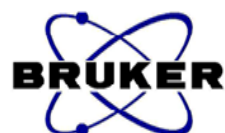

```
NAME      Yasooj UN
EXPNO     111
PROCNO    1
Date_     20150421
Time      08.14
INSTRUM   spect
PROBHD    5 mm PABBO BB-
PULPROG   zg30
TD         65536
SOLVENT   DMSO
NS         32
DS         0
SWH        8012.820 Hz
FIDRES     0.122266 Hz
AQ         4.0894966 sec
RG         203
DM         62.400 usec
DE         6.50 usec
TE         295.6 K
D1         6.00000000 sec
TD0        1
```

```
***** CHANNEL f1 *****
NUC1      1H
P1        14.00 usec
PL1       -2.00 dB
PL1W      11.86339406 W
SFO1      400.2236020 MHz
SI        32768
SF        400.2200000 MHz
WDW       EM
SSD        0
LB         0.30 Hz
GB         0
PC         1.00
```

<sup>13</sup>C NMR (DMSO-d<sub>6</sub>, 100 MHz)

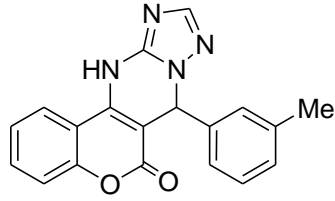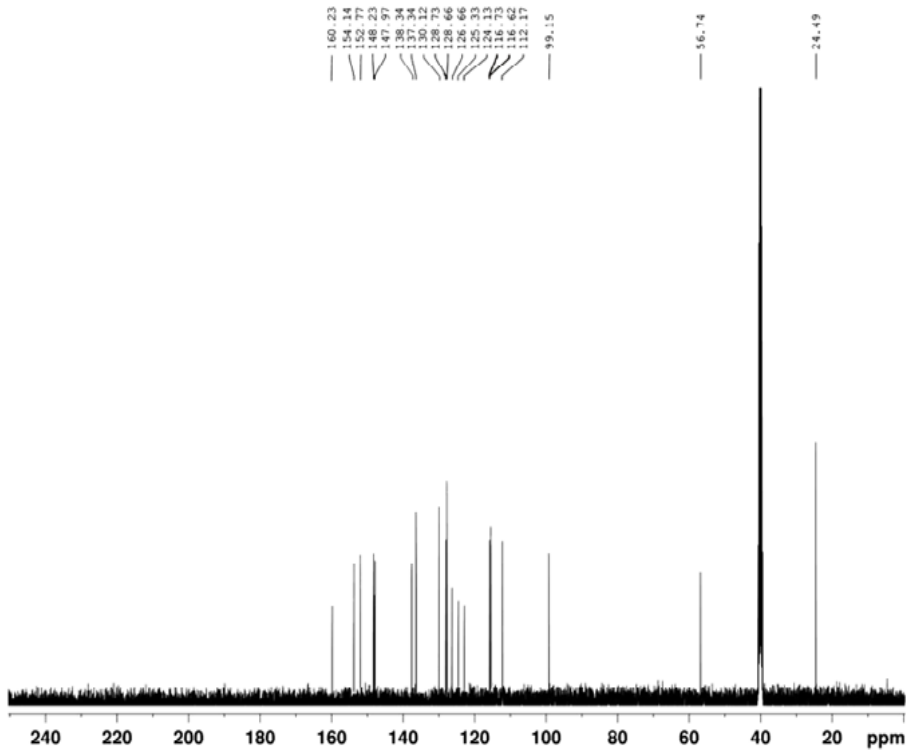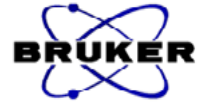

```

NAME      Yasoo1 UN
EXPNO     112
PROCNO    1
Date_     20160421
Time      08.19
INSTRUM   spect
PROBHD    5 mm PABBO DD-
PULPROG   zgpg
ID         65536
SOLVENT   DMSO
NS         70
DS         0
SWH        25252.525 Hz
FIDRES     0.385323 Hz
AQ         1.2976629 sec
RG         2050
DM         19.800 usec
DE         6.50 usec
TE         296.1 K
D1         3.0000000 sec
D11        0.0300000 sec
TDO        1

----- CHANNEL f1 -----
NUC1       13C
P1         9.00 usec
PL1        0.90 dB
PL1W       42.02801895 W
SFO1       100.6479784 MHz

----- CHANNEL f2 -----
CPDPRG2    waltz16
NUC2        1H
PCPD2      90.00 usec
FL2        -2.00 dB
FL12       14.10 dB
PL13       17.30 dB
PL2W       11.86359405 W
PL12W      0.28722104 W
PL13W      0.12139534 W
SFO2       400.2216009 MHz
SI         32768
SF         100.6353990 MHz
WDW        EM
SSB        0
LB         1.00 Hz
GD         0
FC         1.40
    
```

<sup>1</sup>H NMR (DMSO-d<sub>6</sub>, 400 MHz)

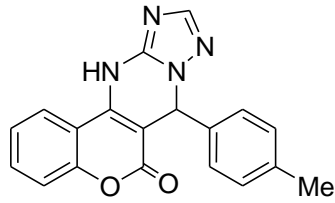

9.492  
7.853  
7.697  
7.682  
7.679  
7.663  
7.650  
7.101  
7.081  
7.047  
7.027  
— 6.091

— 2.628

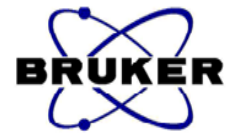

```
NAME      Yasooj UN
EXPNO     113
PROCNO    1
Date_     20150421
Time      08.48
INSTRUM   spect
PROBHD    5 mm PABBO BBI-
PULPROG   zg30
TD         65536
SOLVENT   DMSO
NS         32
DS         0
SWH        8012.820 Hz
FIDRES     0.122266 Hz
AQ         4.0894966 sec
RG         203
DM         62.400 usec
DE         6.50 usec
TE         295.6 K
D1         6.0000000 sec
TD0        1
```

```
----- CHANNEL f1 -----
NUC1      1H
P1         14.00 usec
PL1       -2.00 dB
PL1W      11.86359406 W
SFO1      400.2236020 MHz
SI         32768
SF         400.2200000 MHz
WDW        EM
SSB        0
LB         0.30 Hz
GB         0
PC         1.00
```

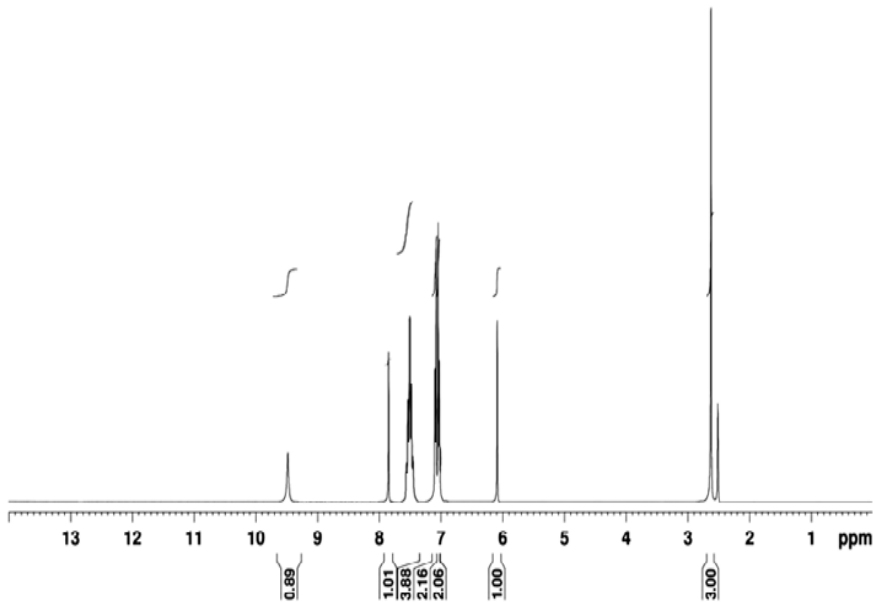

<sup>13</sup>C NMR (DMSO-d<sub>6</sub>, 100 MHz)

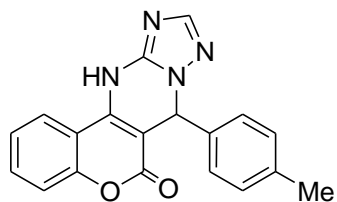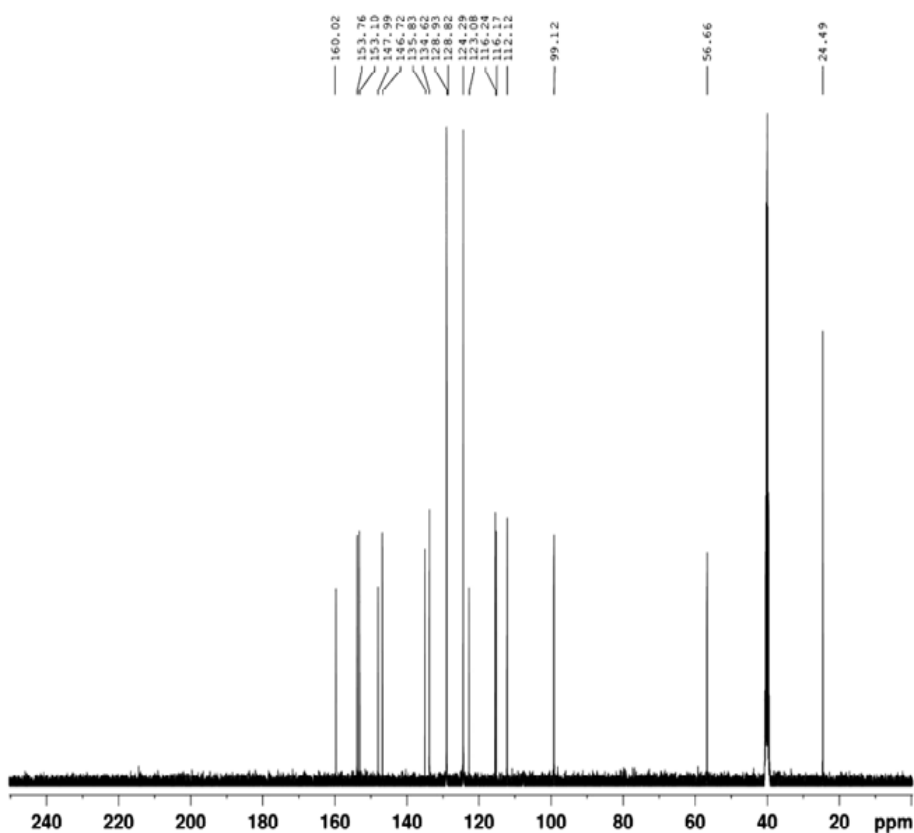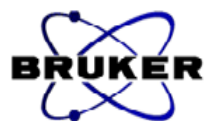

```

NAME      Yasoo1 UN
EXPNO     114
PROCNO    1
Date_     20150421
Time      08.43
INSTRUM   spect
PROBHD    5 mm PABBO BB-
PULPROG   zgpg
TD         65536
SOLVENT   DMSO
NS         70
DS         0
SWH       25252.525 Hz
FIDRES    0.385323 Hz
AQ         1.2976629 sec
RG         2050
DM         19.800 usec
DE         6.50 usec
TE         296.1 K
D1         3.0000000 sec
D11        0.0300000 sec
TDO        1

----- CHANNEL f1 -----
NUC1       13C
P1         9.00 usec
PL1        -0.90 dB
PL1W       42.02801895 W
SFO1       100.6479784 MHz

----- CHANNEL f2 -----
CPDPRG2   waltz16
NUC2       1H
PCPD2     90.00 usec
PL2        -2.00 dB
PL12       14.16 dB
PL13       17.90 dB
PL2W       11.86359406 W
PL12W      0.28722104 W
PL13W      0.12139934 W
SFO2       400.2216009 MHz
SI         32768
SF         100.6333990 MHz
WDW        EM
SSB        0
LB         1.00 Hz
GB         0
DC         1.40
    
```

<sup>1</sup>H NMR (DMSO-d<sub>6</sub>, 400 MHz)

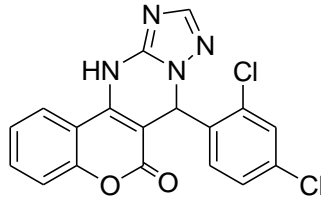

— 10.917

8.256  
7.862  
7.654  
7.636  
7.613  
7.335  
7.313  
7.052  
7.030

— 5.345

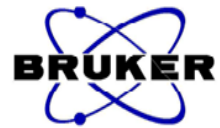

```
NAME      Yasooj UN
EXPNO     117
PROCNO    1
Date_     20150421
Time      09.29
INSTRUM   spect
PROBHD    5 mm PABBO BB-
PULPROG   zg30
TD        65536
SOLVENT   DMSO
NS        32
DS        0
SWH       8012.820 Hz
FIDRES    0.122266 Hz
AQ        4.0894966 sec
RG        233
DW        62.400 usec
DE        6.50 usec
TE        295.6 K
D1        6.0000000 sec
TDO       1
```

```
----- CHANNEL f1 -----
NUC1      1H
P1        14.00 usec
PL1       -2.00 dB
PLW       11.86359406 W
SFO1      400.2236020 MHz
SI        32768
SF        400.2200000 MHz
WDW       EM
SSB       0
LB        0.30 Hz
GB        0
PC        1.00
```

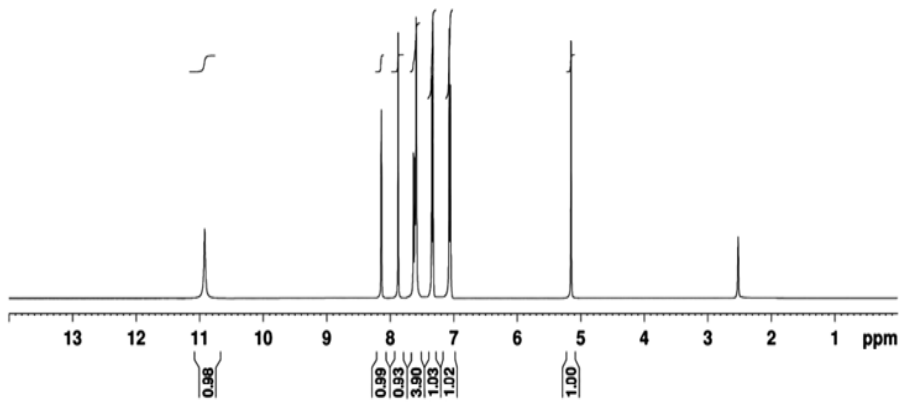



<sup>13</sup>C NMR (DMSO-d<sub>6</sub>, 100 MHz)

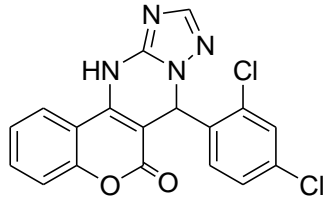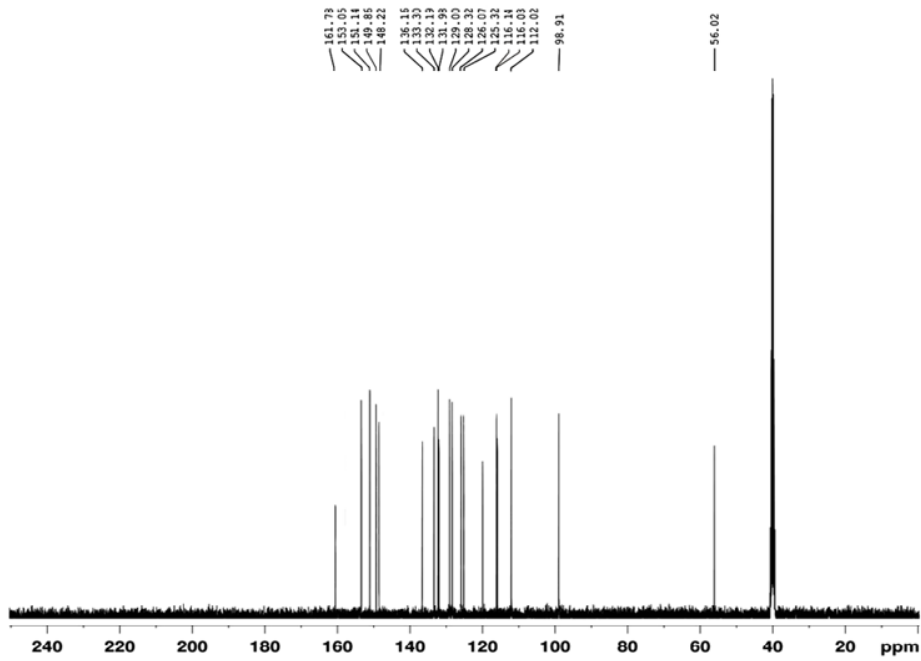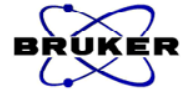

```

NAME      Yassuj UN
EXPNO     118
PROCNO    1
Date_     20150421
Time      09:39
INSTRUM   spect
PROBHD    5 mm PABBO BBI
PULPROG   zgpg
TD         65536
SOLVENT   DMSO
NS         70
DS         0
SWH        25252.525 Hz
FIDRES     0.385323 Hz
AQ         1.2976629 sec
RG         2050
TM         19.800 usec
DE         6.50 usec
TE         296.1 K
D1         3.0000000 sec
d11        0.0300000 sec
TD0        1

----- CHANNEL f1 -----
NUC1       13C
P1         9.00 usec
PL1        -0.90 dB
PL1H       42.02801895 W
SFO1       100.6479784 MHz

----- CHANNEL f2 -----
CFDPFG2   waltz16
NUC2       1H
PCPD2     90.00 usec
PL2        -2.00 dB
PL12       14.16 dB
PL13       17.90 dB
PL12H     11.86359406 W
PL12W     0.28722104 W
PL13W     0.12139934 W
SFO2       400.2216009 MHz
SI         32768
SE         100.6353990 MHz
RGW        EM
SSB        0
LB         1.00 Hz
GB         0
PC         1.40
    
```
